# Supplementary material for: Genome-Wide Identification and Characterization of Long Non-Coding RNAs in Roots of Rice Seedlings under Nitrogen Deficiency
Source: MDPI journal article supplement (doi:10.3390/plants12234047), 2023-11-30
Supplement: s1 [file s1]

**Table S10. List of the primers in this study.**

| Primer Name                | Sequences(5'-3')          | Notes                                                                     |
|----------------------------|---------------------------|---------------------------------------------------------------------------|
| <b>Primers for qRT-PCR</b> |                           |                                                                           |
| eEF-1 qRT/F                | GCACGCTCTTCTTGCTTTC       | Os03g0178000                                                              |
| eEF-1 qRT/R                | AGGGAATCTTGTCAGGGTTG      |                                                                           |
| MSTRG24486.1 qRT/F         | ACTCCTATGTGGCTACTG        |                                                                           |
| MSTRG24486.1 qRT/R         | GCAAGAATGATACTACGC        |                                                                           |
| MSTRG24177.3 qRT/F         | CGGACGATCAATCCTTCCCG      |                                                                           |
| MSTRG24177.3 qRT/R         | TAGTCCCGGATTGGTAGCGA      |                                                                           |
| MSTRG 24320.6 qRT/F        | TCGCTCAAAGCTGCTCTCTC      |                                                                           |
| MSTRG 24320.6 qRT/R        | ATTACCCCTGCCTTACCCT       |                                                                           |
| MSTRG 1614.2 qRT/F         | TGGAAACACCGAGCACTCAA      |                                                                           |
| MSTRG 1614.2 qRT/R         | TCCAGTGGGATCTTCAACGC      |                                                                           |
| MSTRG 12144.19 qRT/F       | TCCATCGCTGCCATGAACTC      |                                                                           |
| MSTRG 12144.19 qRT/R       | TCACATTGCTAGCGTTCACCT     |                                                                           |
| MSTRG 22856.2 qRT/F        | CAAACCCTAGGTGGTGGTCC      |                                                                           |
| MSTRG 22856.2 qRT/R        | CCATAGTTAGCCGAGCGGAG      |                                                                           |
| MSTRG 26592.1 qRT/F        | TGCTATCTGATGAATGATGTCGT   |                                                                           |
| MSTRG 26592.1 qRT/R        | AGCATCCATATTGTTTACACTTGTT |                                                                           |
| MSTRG 10516.1 qRT/F        | TGAAGAGAAGCCCTTGTCGG      |                                                                           |
| MSTRG 10516.1 qRT/R        | GCCAGGTAGGCCAACAATA       |                                                                           |
| LOC4330076 qRT/F           | GGGTGGTTGAAAGGGTAGGG      | Os02g0635000,<br>bifunctional<br>nitrilase/nitrile hydratase<br>NIT4-like |
| LOC4330076 qRT/R           | GCTGTCCTGAGAAGTGGCAT      |                                                                           |
| LOC107278693 qRT/F         | GGTCGCAGAACAAAGCTGAC      | Os04g0339500<br>germacrene D synthase;<br>alpha-humulene synthase         |
| LOC107278693 qRT/R         | CACATCACGGTGGTCAATGC      |                                                                           |
| LOC4344505 qRT/F           | TTCCACCCGTCCAACAGC        | Os08g0113900,<br>uncharacterized protein                                  |
| LOC4344505 qRT/R           | TGTCGATTACCACCATGGACA     |                                                                           |
| LOC107277478 qRT/F         | CGAGGCGGTTCGGGATG         | Os01g0547600, high-<br>affinity nitrate transporter<br>2.4                |
| LOC107277478 qRT/R         | TTTGCAGACGAAGGGAACGA      |                                                                           |
| LOC4345353 qRT/F           | ACGGCTTCATCGTACCACAA      | Os08g0352100<br>uncharacterized protein                                   |
| LOC4345353 qRT/R           | GTCGTAGTAGCCAGCACCTC      |                                                                           |
| LOC4348926 qRT/F           | AGCTCTACGCCAAGCAGAAG      | Os10g0481500, flotillin-<br>like protein 1, Nodulin-<br>like protein 1    |
| LOC4348926 qRT/R           | TTGCTCCACACGCTGATCTT      |                                                                           |
| LOC107276221 qRT/F         | GTGAACTCCGAGATCGACCG      | Os11g0671200,<br>uncharacterized protein                                  |
| LOC107276221 qRT/R         | CATCTTGTCCTCGCCGTCAT      |                                                                           |
| Os09g0263933 qRT/F         | GAGGTCCTGAAGAATCCGGC      | LOC_Os09g08920.1,<br>flavonoid 3-<br>monooxygenase                        |
| Os09g0263933 qRT/R         | GACATCCGGGGTATCAGCAG      |                                                                           |

|                     |                      |                  |
|---------------------|----------------------|------------------|
| Os09g08890.1 qRT/F  | TGACTTTGCACGACAAAGCG | LOC_Os09g08890.1 |
| Os09g08890.1 qRT/R  | TCCGGGGAGAATTCGCAAAA |                  |
| Os09g08900.1 qRT/F  | CACCGGAGGTTGCTTGTTTG | LOC_Os09g08900.1 |
| Os09g08900.1 qRT/R  | ATAACTTGGGCAAGGGTCGG |                  |
| Os09g088910.1 qRT/F | GGTCGAGTGGTCTCAGTTGG | LOC_Os09g08910.1 |
| Os09g088910.1 qRT/R | GGCCTAACATGGCCTTTCCT |                  |
| Os09g088930.1 qRT/F | CACAATCCGCACAGCAAACA | LOC_Os09g08930.1 |
| Os09g088930.1 qRT/R | CCCGTTGCAACCTCCTTAGT |                  |

**Primers for vector construction**

|                                    |                                |                                                        |
|------------------------------------|--------------------------------|--------------------------------------------------------|
| lncRNA24320.6 Pro F                | GGGGTACCTGACGGATCGGAGGGAC      | For cloning and construction of lncRNA24320.6 promoter |
| lncRNA24320.6 Pro R                | T<br>CATGCCATGGATGGAAGGCGGGATG |                                                        |
| lncRNA24320.6 OE-F <i>Hind</i> III | AAAC                           | For cloning the full length of lncRNA24320.6           |
|                                    | GCTAAGCTTCCCCGCATTTCGCTCAA     |                                                        |
| lncRNA24320.6 OE-R <i>Bam</i> HI   | AGC                            |                                                        |
|                                    | GCTGGATCCTAAAAGCTTTCAAAC       |                                                        |
| Hpt-t/F                            | AGT                            |                                                        |
| Hpt-t/R                            | GATGTTGGCGACCTCGTATT           |                                                        |
|                                    | TCGTTATGTTTATCGGCACTTT         |                                                        |

---
